# Supplementary material for: Enhanced photocatalytic hydrogen peroxide production over g-C 3 N 4 /MoS 2 composites through phase-interface engineering: electron transfer and synergy mechanism
Source: Royal Society of Chemistry journal article supplement (doi:10.1039/d5ta08747c), 2025-12-16
Supplement: d5ta08747c1.pdf [file d5ta08747c1.pdf]

# Supplementary Material

## **Enhanced Photocatalytic Hydrogen Peroxide Production over g-C<sub>3</sub>N<sub>4</sub>/MoS<sub>2</sub> composites through Phase-Interface Engineering: Electron Transfer and Synergy Mechanism**

Yuxing Cai, Keqiang Shi, Cheng-Chao Jin\*, Rongrong Jia, Jian-Hao Wu, Xiaozhuo Wang, Mengshan Hou, Chenghao Bao, Lan Li, Zhi Chen\*

*College of Materials and Chemistry, China Jiliang University, Hangzhou 310018, P. R. China.*

\*Corresponding authors: ccjin\_cn@163.com (C. Jin); zchen@cjl.u.edu.cn (Z. Chen).

## Figures

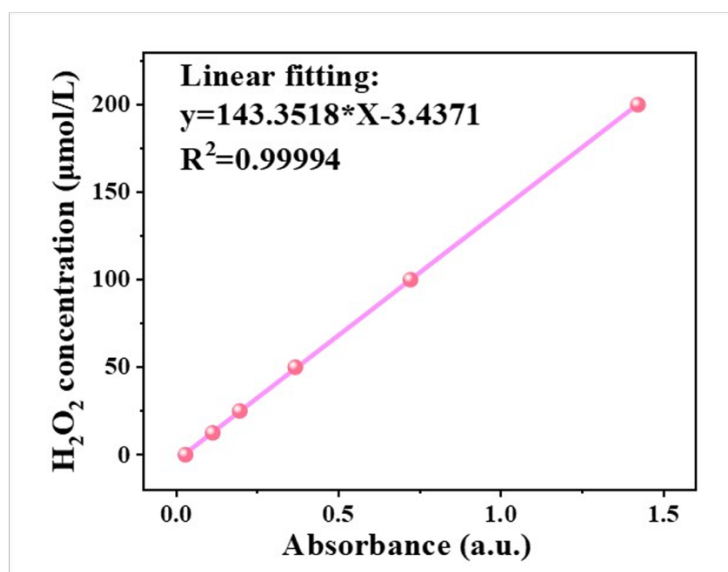

Fig. S1 Linear fitting equation of H<sub>2</sub>O<sub>2</sub> concentration determined by iodimetry.

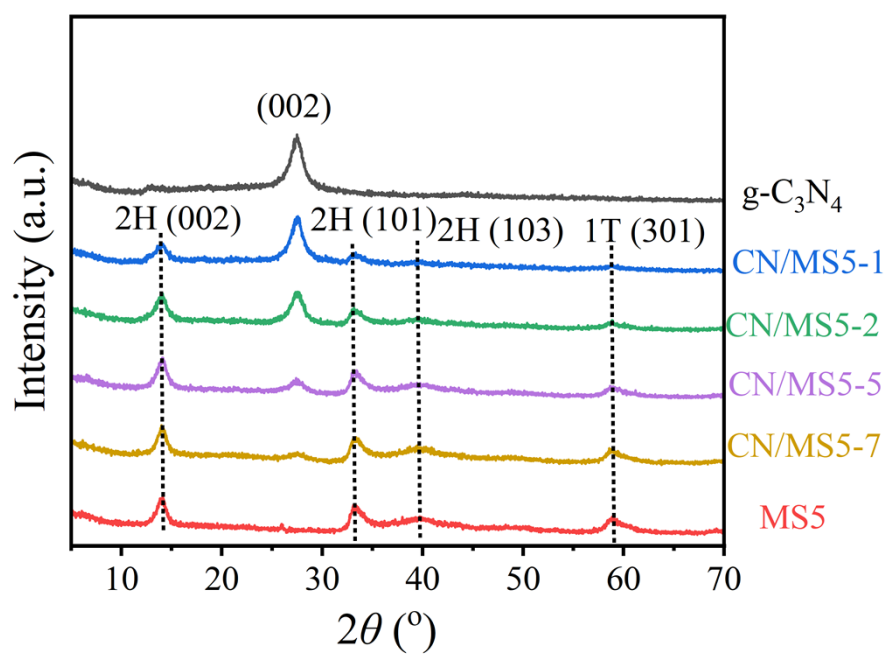

Fig. S2 XRD patterns of the CN/MS5-based heterojunctions

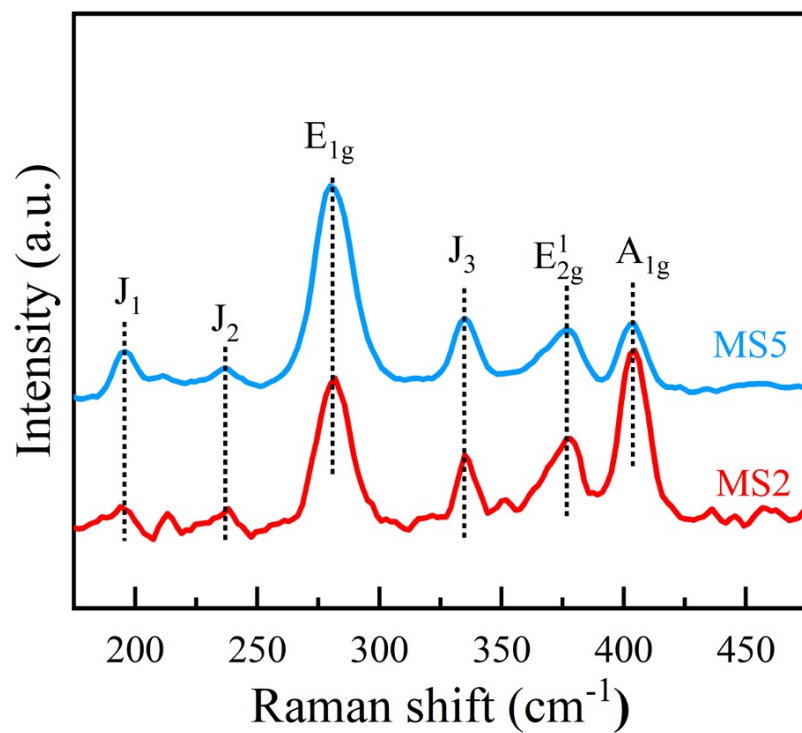

**Fig. S3** Raman spectra of MS2 and MS5

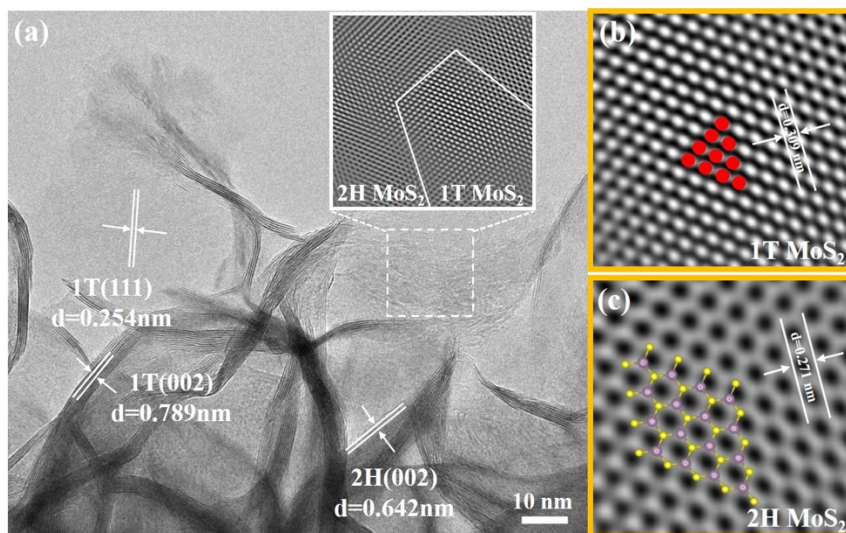

**Fig. S4** (a) TEM image of MS2. HRTEM images for (b) 1T-phase MoS<sub>2</sub> and (c) 2H-phase MoS<sub>2</sub>, respectively.

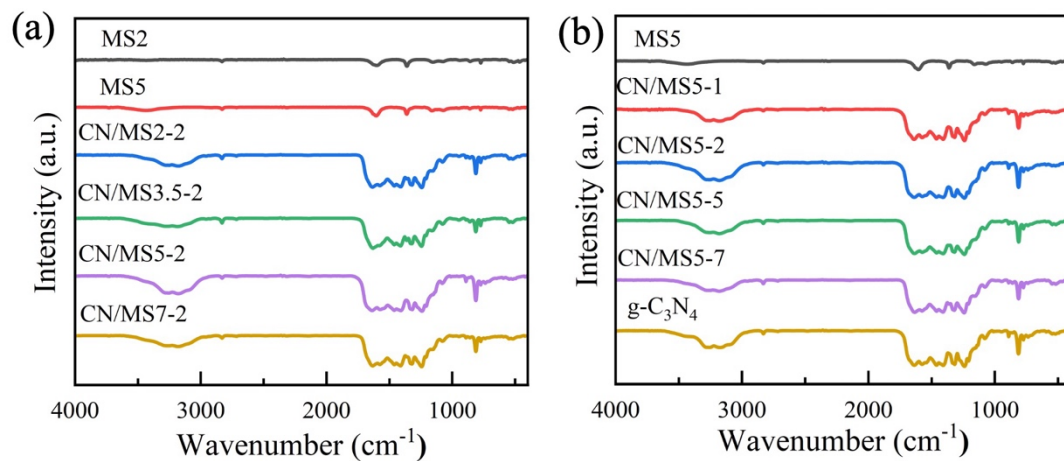

**Fig. S5** FT-IR spectra of various samples.

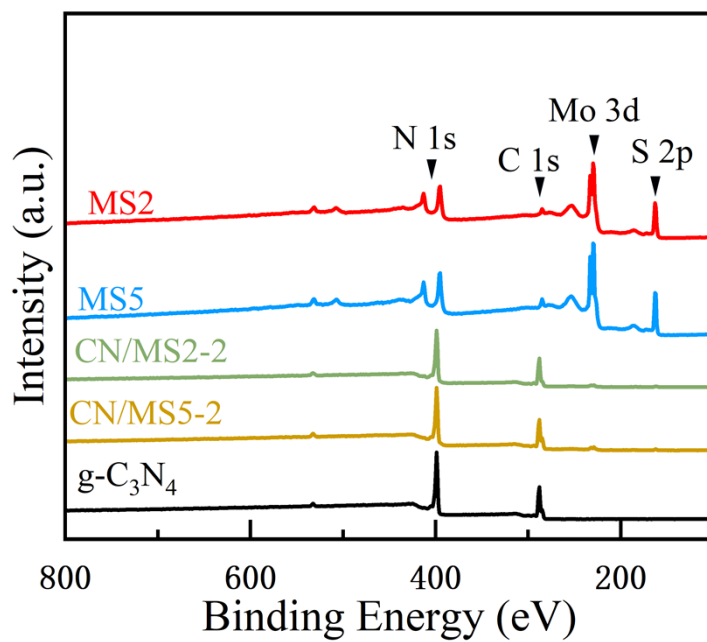

**Fig. S6** XPS spectra of g-C<sub>3</sub>N<sub>4</sub>, MS2, MS5, CN/MS2-2, and CN/MS5-2.

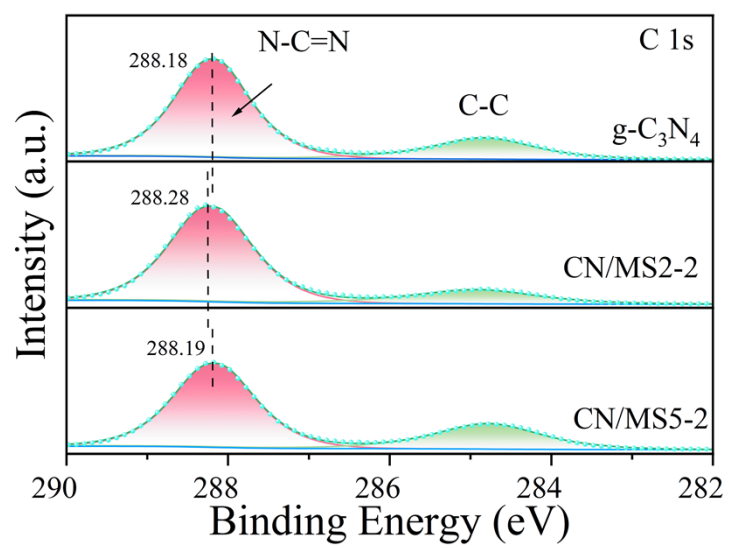

**Fig. S7** High-resolution XPS spectra of C 1s

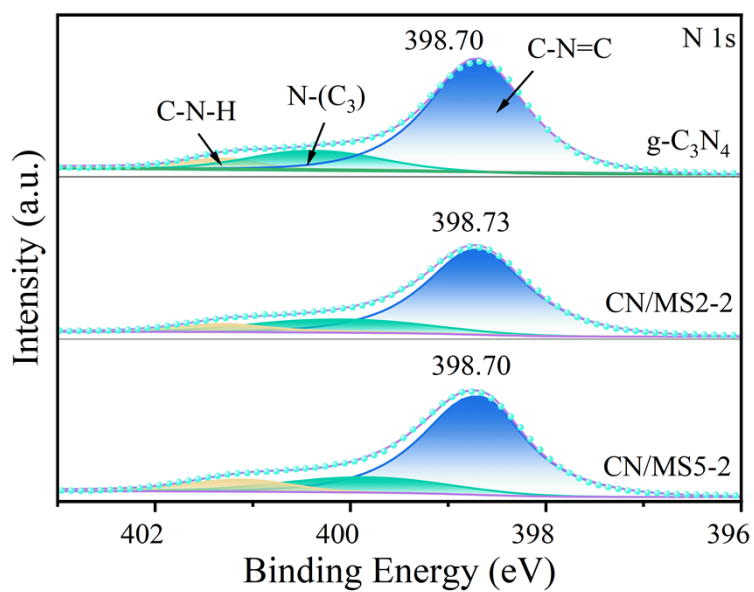

**Fig. S8** High-resolution XPS spectra of N 1s

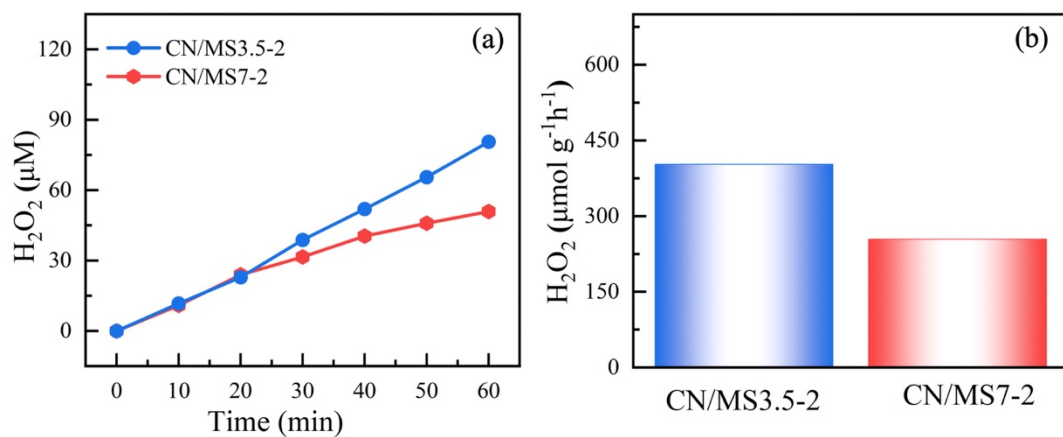

**Fig. S9** Photocatalytic  $\text{H}_2\text{O}_2$  production and corresponding yield on CN/MS3.5-2 and CN/MS7-2 catalysts.

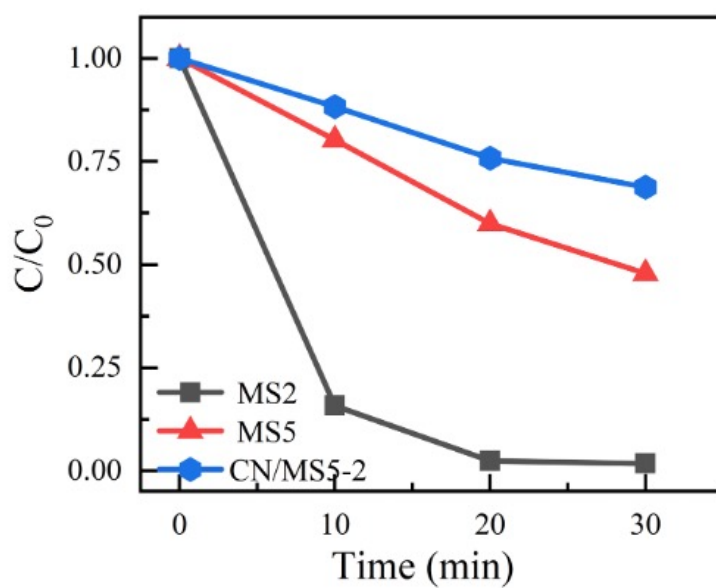

**Fig. S10** Decomposition of  $\text{H}_2\text{O}_2$  by MS2, MS5, and CN/MS5-2 under  $\text{N}_2$  conditions

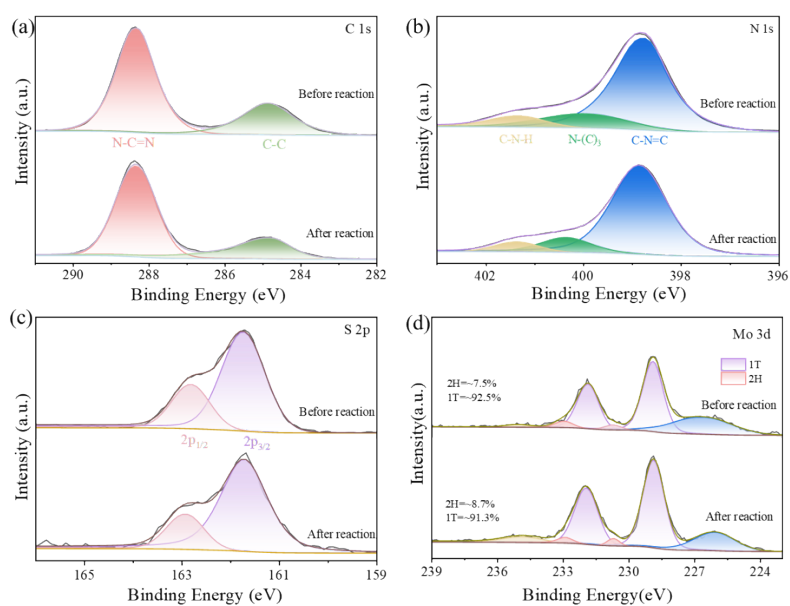

**Fig. S11** High-resolution XPS spectra of (a) C 1s, (b) N 1s, (c) 2p, and (d) Mo 3d for CN/MS5-2 before and after photocatalytic reaction.

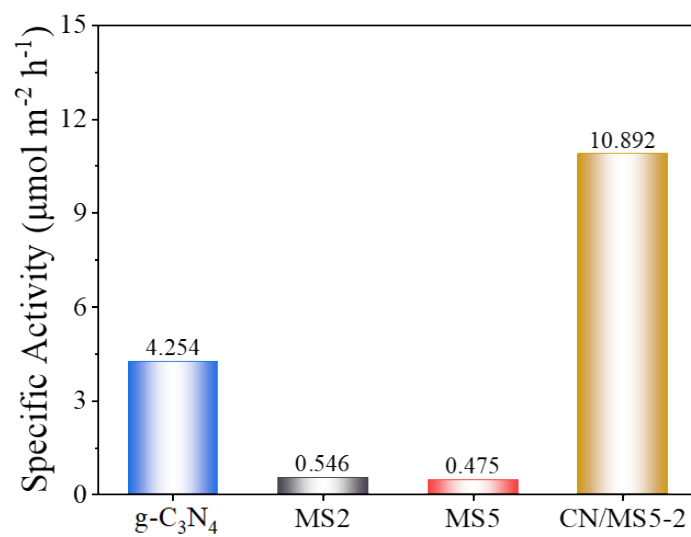

**Fig. S12** Unit area activity of the sample

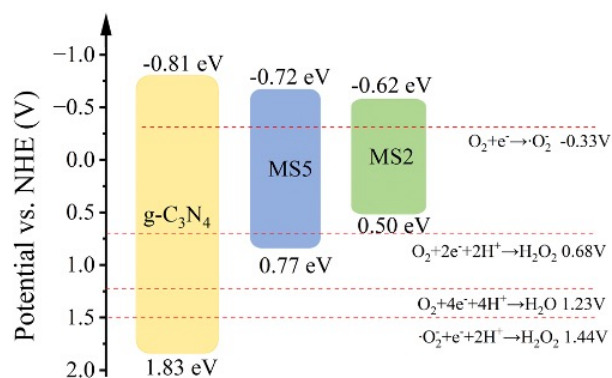

**Fig. S13** Energy band structures for g-C<sub>3</sub>N<sub>4</sub>, MS2, and MS5.

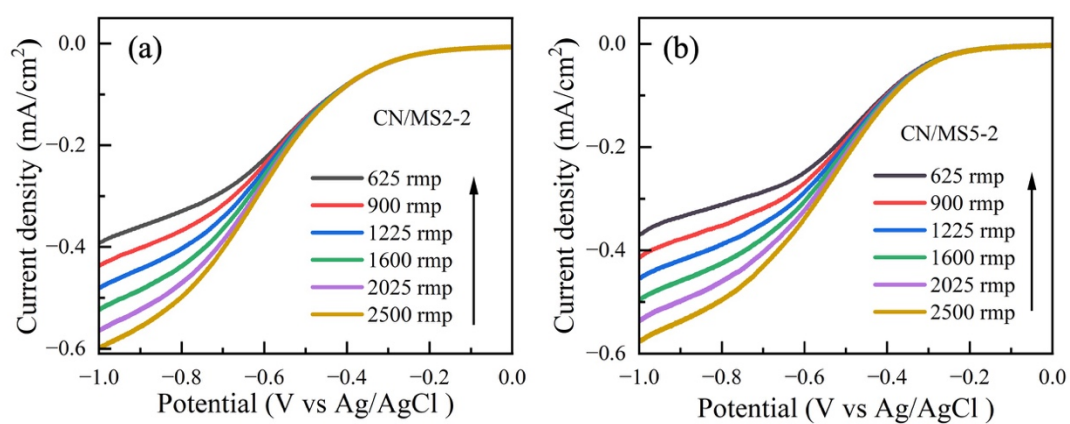

**Fig. S14** LSV curves of (a) CN/MS2-2 and (b) CN/MS5-2.
